# Supplementary material for: A Hybrid Traceability Technology Selection Approach for Sustainable Food Supply Chains
Source: MDPI journal article supplement (doi:10.3390/su13169385), 2021-08-21
Supplement: s1 [file s1]

**Table S1.** Technology performance matrix.

| Benefit                                 | Cost (C1)          | Vulnerability to Water (C2) | Flexibility (C3) | Accuracy of Information (C4) | Reading Range (C5) | Data Transfer Speed (C6) | Multiple Tags Readability (C7) | Identification Capacity (C8) | Tag Writing Cycle (C9) |
|-----------------------------------------|--------------------|-----------------------------|------------------|------------------------------|--------------------|--------------------------|--------------------------------|------------------------------|------------------------|
| Paper based recording                   | (0.0, 0.1, 0.2)    | (0.8, 0.9, 1.0)             | (0.0, 0.1, 0.2)  | (0.0, 0.1, 0.2)              | (0.0, 0.0, 0.0)    | (0.0, 0.0, 0.0)          | (0.0, 0.0, 0.0)                | (0.8, 0.9, 1.0)              | (0.0, 0.0, 0.0)        |
| 1D Barcode                              | (0.0, 0.05, 0.1)   | (0.3, 0.5, 0.7)             | (0.8, 0.9, 1.0)  | (0.5, 0.75, 0.9)             | (0.0, 0.1, 0.2)    | (0.1, 0.2, 0.3)          | (0.0, 0.0, 0.0)                | (0.3, 0.5, 0.7)              | (0.0, 0.1, 0.2)        |
| 2D barcode                              | (0.0, 0.05, 0.1)   | (0.3, 0.5, 0.7)             | (0.8, 0.9, 1.0)  | (0.5, 0.75, 0.9)             | (0.0, 0.1, 0.2)    | (0.1, 0.2, 0.3)          | (0.0, 0.0, 0.0)                | (0.8, 0.9, 1.0)              | (0.0, 0.1, 0.2)        |
| RFID passive LF read-only               | (0.3, 0.5, 0.7)    | (0.0, 0.0, 0.0)             | (0.3, 0.5, 0.7)  | (0.8, 0.9, 1.0)              | (0.1, 0.2, 0.3)    | (0.15, 0.25, 0.35)       | (0.0, 0.0, 0.0)                | (0.8, 0.9, 1.0)              | (0.0, 0.0, 0.0)        |
| RFID passive LF read-write              | (0.3, 0.5, 0.7)    | (0.0, 0.0, 0.0)             | (0.3, 0.5, 0.7)  | (0.8, 0.9, 1.0)              | (0.1, 0.2, 0.3)    | (0.15, 0.25, 0.35)       | (0.1, 0.2, 0.3)                | (0.8, 0.9, 1.0)              | (0.8, 0.9, 1.0)        |
| RFID passive HF read-only               | (0.3, 0.5, 0.7)    | (0.0, 0.0, 0.0)             | (0.7, 0.8, 0.9)  | (0.8, 0.9, 1.0)              | (0.3, 0.5, 0.7)    | (0.3, 0.5, 0.7)          | (0.3, 0.5, 0.7)                | (0.8, 0.9, 1.0)              | (0.0, 0.0, 0.0)        |
| RFID passive HF read-write              | (0.3, 0.5, 0.7)    | (0.0, 0.0, 0.0)             | (0.7, 0.8, 0.9)  | (0.8, 0.9, 1.0)              | (0.3, 0.5, 0.7)    | (0.3, 0.5, 0.7)          | (0.3, 0.5, 0.7)                | (0.8, 0.9, 1.0)              | (0.8, 0.9, 1.0)        |
| RFID passive HF with sensor             | (0.3, 0.5, 0.7)    | (0.0, 0.0, 0.0)             | (0.7, 0.8, 0.9)  | (0.8, 0.9, 1.0)              | (0.1, 0.2, 0.3)    | (0.3, 0.5, 0.7)          | (0.3, 0.5, 0.7)                | (0.8, 0.9, 1.0)              | (0.8, 0.9, 1.0)        |
| RFID passive UHF read only              | (0.5, 0.7, 0.8)    | (0.6, 0.75, 0.85)           | (0.8, 0.9, 1.0)  | (0.8, 0.9, 1.0)              | (0.7, 0.8, 0.9)    | (0.5, 0.75, 0.9)         | (0.6, 0.75, 0.85)              | (0.8, 0.9, 1.0)              | (0.0, 0.0, 0.0)        |
| RFID passive UHF read-write             | (0.5, 0.7, 0.8)    | (0.6, 0.75, 0.85)           | (0.8, 0.9, 1.0)  | (0.8, 0.9, 1.0)              | (0.7, 0.8, 0.9)    | (0.5, 0.75, 0.9)         | (0.6, 0.75, 0.85)              | (0.8, 0.9, 1.0)              | (0.8, 0.9, 1.0)        |
| RFID passive UHF read write with sensor | (0.5, 0.7, 0.8)    | (0.6, 0.75, 0.85)           | (0.8, 0.9, 1.0)  | (0.8, 0.9, 1.0)              | (0.3, 0.5, 0.7)    | (0.5, 0.75, 0.9)         | (0.6, 0.75, 0.85)              | (0.8, 0.9, 1.0)              | (0.8, 0.9, 1.0)        |
| Semi passive RFID                       | (0.75, 0.85, 0.95) | (0.6, 0.75, 0.85)           | (0.1, 0.2, 0.3)  | (0.8, 0.9, 1.0)              | (0.7, 0.8, 0.9)    | (0.7, 0.8, 0.9)          | (0.6, 0.75, 0.85)              | (0.8, 0.9, 1.0)              | (0.8, 0.9, 1.0)        |
| Active RFID                             | (0.8, 0.9, 1.0)    | (0.0, 0.0, 0.0)             | (0.0, 0.0, 0.0)  | (0.8, 0.9, 1.0)              | (0.8, 0.9, 1.0)    | (0.8, 0.9, 1.0)          | (0.8, 0.9, 1.0)                | (0.8, 0.9, 1.0)              | (0.8, 0.9, 1.0)        |
| NFC                                     | (0.1, 0.2, 0.3)    | (0.0, 0.1, 0.2)             | (0.7, 0.8, 0.9)  | (0.8, 0.9, 1.0)              | (0.1, 0.2, 0.3)    | (0.3, 0.5, 0.7)          | (0.3, 0.5, 0.7)                | (0.8, 0.9, 1.0)              | (0.8, 0.9, 1.0)        |
| WSN                                     | (0.8, 0.9, 1.0)    | (0.0, 0.0, 0.0)             | (0.0, 0.0, 0.0)  | (0.8, 0.9, 1.0)              | (0.8, 0.9, 1.0)    | (0.4, 0.6, 0.75)         | (0.0, 0.0, 0.0)                | (0.0, 0.0, 0.0)              | (0.0, 0.0, 0.0)        |
| Smart packaging indicator               | (0.7, 0.8, 0.9)    | (0.0, 0.0, 0.0)             | (0.8, 0.9, 1.0)  | (0.8, 0.9, 1.0)              | (0.0, 0.0, 0.0)    | (0.0, 0.0, 0.0)          | (0.0, 0.0, 0.0)                | (0.0, 0.0, 0.0)              | (0.0, 0.0, 0.0)        |

Table S1. Cont.

| Benefit                                 | Memory Capacity (C10) | Environmental Parameters Recording (C11) | Real Time Location Recording (C12) | Real Time Alert (C13) | Durability of Data Carrier (C14) | World-Wide Standard (C15) | Data Security (C16) | Manual Data Readability (C17) |
|-----------------------------------------|-----------------------|------------------------------------------|------------------------------------|-----------------------|----------------------------------|---------------------------|---------------------|-------------------------------|
| Paper based recording                   | (0.0, 0.0, 0.0)       | (0.0, 0.0, 0.0)                          | (0.0, 0.0, 0.0)                    | (0.0, 0.0, 0.0)       | (0.0, 0.1, 0.2)                  | (0.0, 0.0, 0.0)           | (0.0, 0.0, 0.0)     | (0.8, 0.9, 1.0)               |
| 1D Barcode                              | (0.0, 0.1, 0.2)       | (0.0, 0.0, 0.0)                          | (0.0, 0.0, 0.0)                    | (0.0, 0.0, 0.0)       | (0.0, 0.1, 0.2)                  | (0.8, 0.9, 1.0)           | (0.1, 0.2, 0.3)     | (0.8, 0.9, 1.0)               |
| 2D barcode                              | (0.5, 0.7, 0.8)       | (0.0,0.0,0.0)                            | (0.0,0.0,0.0)                      | (0.0,0.0,0.0)         | (0.0, 0.1, 0.2)                  | (0.8, 0.9, 1.0)           | (0.3, 0.5, 0.7)     | (0.0, 0.0, 0.0)               |
| RFID passive LF read-only               | (0.1, 0.2, 0.3)       | (0.0, 0.0, 0.0)                          | (0.0, 0.0, 0.0)                    | (0.0, 0.0, 0.0)       | (0.8, 0.9, 1.0)                  | (0.8, 0.9, 1.0)           | (0.3, 0.5, 0.7)     | (0.0, 0.0, 0.0)               |
| RFID passive LF read-write              | (0.2, 0.3, 0.4)       | (0.0,0.0,0.0)                            | (0.0,0.0,0.0)                      | (0.0,0.0,0.0)         | (0.8, 0.9, 1.0)                  | (0.8, 0.9, 1.0)           | (0.8, 0.9, 1.0)     | (0.0, 0.0, 0.0)               |
| RFID passive HF read-only               | (0.1, 0.2, 0.3)       | (0.0, 0.0, 0.0)                          | (0.0, 0.0, 0.0)                    | (0.0, 0.0, 0.0)       | (0.8, 0.9, 1.0)                  | (0.8, 0.9, 1.0)           | (0.3, 0.5, 0.7)     | (0.0, 0.0, 0.0)               |
| RFID passive HF read-write              | (0.3, 0.5,0.7)        | (0, 0, 0)                                | (0.0, 0.0, 0.0)                    | (0.0, 0.0, 0.0)       | (0.8, 0.9, 1.0)                  | (0.8, 0.9, 1.0)           | (0.8, 0.9, 1.0)     | (0.0, 0.0, 0.0)               |
| RFID passive HF with sensor             | (0.3, 0.5, 0.7)       | (0.3, 0.5, 0.7)                          | (0.0, 0.0, 0.0)                    | (0.0, 0.0, 0.0)       | (0.8, 0.9, 1.0)                  | (0.8, 0.9, 1.0)           | (0.8, 0.9, 1.0)     | (0.0, 0.0, 0.0)               |
| RFID passive UHF read only              | (0.1, 0.2, 0.3)       | (0.0, 0.0, 0.0)                          | (0.0, 0.0, 0.0)                    | (0.0, 0.0, 0.0)       | (0.8, 0.9, 1.0)                  | (0.8, 0.9, 1.0)           | (0.3, 0.5, 0.7)     | (0.0, 0.0, 0.0)               |
| RFID passive UHF read-write             | (0.5, 0.7, 0.8)       | (0.0, 0.0, 0.0)                          | (0.0, 0.0, 0.0)                    | (0.0, 0.0, 0.0)       | (0.8, 0.9, 1.0)                  | (0.8, 0.9, 1.0)           | (0.8, 0.9, 1.0)     | (0.0, 0.0, 0.0)               |
| RFID passive UHF read write with sensor | (0.5, 0.7, 0.8)       | (0.3, 0.5, 0.7)                          | (0.0, 0.0, 0.0)                    | (0.0, 0.0, 0.0)       | (0.8, 0.9, 1.0)                  | (0.8, 0.9, 1.0)           | (0.8, 0.9, 1.0)     | (0.0, 0.0, 0.0)               |
| Semi passive RFID                       | (0.7, 0.8, 0.9)       | (0.8, 0.9, 1.0)                          | (0.8, 0.9, 1.0)                    | (0.8, 0.9, 1.0)       | (0.3, 0.6, 0.8)                  | (0.8, 0.9, 1.0)           | (0.8, 0.9, 1.0)     | (0.0, 0.0, 0.0)               |
| Active RFID                             | (0.8, 0.9, 1.0)       | (0.8, 0.9, 1.0)                          | (0.8, 0.9, 1.0)                    | (0.8, 0.9, 1.0)       | (0.3, 0.6, 0.8)                  | (0.8, 0.9, 1.0)           | (0.8, 0.9, 1.0)     | (0.0, 0.0, 0.0)               |
| NFC                                     | (0.3, 0.5, 0.7)       | (0.0, 0.0, 0.0)                          | (0.0, 0.0, 0.0)                    | (0.0, 0.0, 0.0)       | (0.8, 0.9, 1.0)                  | (0.8, 0.9, 1.0)           | (0.8, 0.9, 1.0)     | (0.0, 0.0, 0.0)               |
| WSN                                     | (0.1, 0.2, 0.3)       | (0.8, 0.9, 1.0)                          | (0.8, 0.9, 1.0)                    | (0.8, 0.9, 1.0)       | (0.3, 0.6, 0.8)                  | (0.8, 0.9, 1.0)           | (0.8, 0.9, 1.0)     | (0.0, 0.0, 0.0)               |
| Smart packaging indicator               | (0.7, 0.8, 0.9)       | (0.8, 0.9, 1.0)                          | (0.0, 0.0, 0.0)                    | (0.8, 0.9, 1.0)       | (0.0, 0.1, 0.2)                  | (0.0, 0.0, 0.0)           | (0.0, 0.0, 0.0)     | (0.8, 0.9, 1.0)               |

**Table S2.** Combined pairwise criteria comparison matrix for two decision makers for case 2.

| Criteria | C4                    | C6                    | C5                    | C8                    | C9                    |
|----------|-----------------------|-----------------------|-----------------------|-----------------------|-----------------------|
| C4       | (1, 1, 1)             | (0.816, 1.225, 2)     | (0.775, 1, 1.291)     | (0.183, 0.224, 0.289) | (0.289, 0.408, 0.707) |
| C6       | (0.500, 0.816, 1.225) | (1, 1, 1)             | (0.500, 0.816, 1.225) | (0.169, 0.204, 0.258) | (0.258, 0.354, 0.577) |
| C5       | (0.775, 1, 1.291)     | (0.816, 1.225, 2)     | (1, 1, 1)             | (0.204, 0.267, 0.408) | (0.408, 0.632, 0.866) |
| C8       | (3.464, 4.472, 5.477) | (3.873, 4.899, 5.916) | (2.449, 3.742, 4.899) | (1, 1, 1)             | (2, 3, 4)             |
| C9       | (1.414, 2.449, 3.464) | (1.732, 2.828, 3.873) | (1.155, 1.581, 2.449) | (0.250, 0.333, 0.500) | (1, 1, 1)             |
| C10      | (3.162, 4.243, 5.292) | (4, 5, 6)             | (2.236, 3.464, 4.583) | (0.577, 0.707, 1)     | (1.732, 2.828, 3.873) |
| C11      | (3.464, 4.472, 5.477) | (4.243, 5.292, 6.325) | (2.646, 4, 5.196)     | (1, 1.414, 1.732)     | (2.449, 3.464, 4.472) |
| C15      | (0.333, 0.500, 1)     | (0.500, 0.816, 1.225) | (0.577, 0.775, 1)     | (0.154, 0.183, 0.224) | (0.224, 0.289, 0.408) |
| C1       | (0.183, 0.224, 0.289) | (0.204, 0.258, 0.354) | (0.204, 0.267, 0.408) | (0.111, 0.125, 0.143) | (0.143, 0.167, 0.200) |
| C16      | (0.189, 0.236, 0.316) | (0.200, 0.250, 0.333) | (0.189, 0.236, 0.316) | (0.118, 0.126, 0.136) | (0.144, 0.169, 0.204) |
|          | C10                   | C11                   | C15                   | C1                    | C16                   |
| C4       | (0.189, 0.236, 0.316) | (0.183, 0.224, 0.289) | (1, 2, 3)             | (3.464, 4.472, 5.477) | (3.162, 4.243, 5.292) |
| C6       | (0.167, 0.200, 0.250) | (0.158, 0.189, 0.236) | (0.816, 1.224, 2)     | (2.828, 3.873, 4.899) | (3, 4, 5)             |
| C5       | (0.218, 0.289, 0.447) | (0.192, 0.250, 0.378) | (1, 1.291, 1.732)     | (2.449, 3.742, 4.899) | (3.162, 4.243, 5.292) |
| C8       | (1, 1.414, 1.732)     | (0.577, 0.707, 1)     | (4.472, 5.477, 6.481) | (7, 8, 9)             | (7.348, 7.937, 8.485) |
| C9       | (0.258, 0.354, 0.577) | (0.224, 0.289, 0.408) | (2.449, 3.464, 4.472) | (5, 6, 7)             | (4.899, 5.916, 6.928) |
| C10      | (1, 1, 1)             | (0.500, 0.577, 0.707) | (4.243, 5.292, 6.325) | (7.348, 7.937, 8.485) | (7, 8, 9)             |
| C11      | (1.414, 1.732, 2)     | (1, 1, 1)             | (4.472, 5.477, 6.481) | (6.481, 7.483, 8.485) | (6.708, 7.348, 7.937) |
| C15      | (0.158, 0.189, 0.236) | (0.154, 0.183, 0.224) | (1, 1, 1)             | (2.449, 3.464, 4.472) | (2, 3.162, 4.243)     |
| C1       | (0.118, 0.126, 0.136) | (0.118, 0.134, 0.154) | (0.224, 0.289, 0.408) | (1, 1, 1)             | (0.577, 1, 1.732)     |
| C16      | (0.111, 0.125, 0.143) | (0.126, 0.136, 0.149) | (0.236, 0.316, 0.500) | (0.577, 1, 1.732)     | (1, 1, 1)             |

**Table S3.** TOPSIS scores and augmented scores of technologies for case 2.

| <div>Score</div> <div>Technologies</div> | TOPSIS score | Augmented score |
|------------------------------------------|--------------|-----------------|
| 1D Barcode                               | 0.215036     | 1               |
| Paper records                            | 0.285938     | 2               |
| RFID passive LF read-only                | 0.325128     | 4               |
| RFID passive HF read-only                | 0.335634     | 8               |
| RFID passive UHF read only               | 0.348900     | 16              |
| RFID passive LF read-write               | 0.382646     | 32              |
| 2D barcode                               | 0.419489     | 64              |
| NFC                                      | 0.423791     | 128             |
| RFID passive HF read-write               | 0.429226     | 256             |
| RFID passive UHF read-write              | 0.469872     | 512             |
| WSN                                      | 0.551499     | 1024            |
| RFID passive HF with sensor              | 0.618166     | 2048            |
| Smart packaging indicator                | 0.624862     | 4096            |
| RFID passive UHF read write with sensor  | 0.676235     | 8192            |
| Semi passive RFID                        | 0.928689     | 16384           |
| Active RFID                              | 0.959471     | 32768           |

**Table S4.** The combined pairwise criteria comparison matrix for two decision makers for case 3.

| Criteria   | C3                     | C4                     | C8                    | C9                    | C10                   | C15                   | C16                   | C1                    |
|------------|------------------------|------------------------|-----------------------|-----------------------|-----------------------|-----------------------|-----------------------|-----------------------|
| <b>C3</b>  | (1, 1, 1)              | (0.577, 1, 1.732)      | (2.449, 3.464, 4.472) | (5, 6, 7)             | (3.464, 4.472, 5.477) | (1.414, 2.449, 3.464) | (4.899, 5.916, 6.928) | (0.224, 0.289, 0.408) |
| <b>C4</b>  | (0.577, 1, 1.732)      | (1, 1, 1)              | (2.449, 3.464, 4.472) | (4.899, 5.916, 6.928) | (3.464, 4.472, 5.477) | (1.414, 2.449, 3.464) | (5, 6, 7)             | (0.224, 0.289, 0.408) |
| <b>C8</b>  | (0.224, 0.2887, 0.408) | (0.224, 0.289, 0.408)  | (1, 1, 1)             | (2.449, 3.464, 4.472) | (1, 2, 3)             | (0.333, 0.500, 1)     | (2.449, 3.464, 4.472) | (0.143, 0.167, 0.200) |
| <b>C9</b>  | (0.143, 0.167, 0.200)  | (0.144, 0.169, 0.204)  | (0.224, 0.289, 0.408) | (1, 1, 1)             | (0.289, 0.408, 0.707) | (0.183, 0.224, 0.289) | (0.577, 1, 1.732)     | (0.111, 0.119, 0.126) |
| <b>C10</b> | (0.183, 0.224, 0.289)  | (0.183, 0.224, 0.2887) | (0.333, 0.500, 1)     | (1.414, 2.449, 3.464) | (1, 1, 1)             | (0.250, 0.333, 0.500) | (1.414, 2.449, 3.464) | (0.125, 0.143, 0.167) |
| <b>C15</b> | (0.289, 0.408, 0.707)  | (0.289, 0.408, 0.707)  | (1, 2, 3)             | (3.464, 4.472, 5.477) | (2, 3, 4)             | (1, 1, 1)             | (3.464, 4.472, 5.477) | (0.167, 0.200, 0.250) |
| <b>C16</b> | (0.144, 0.169, 0.204)  | (0.143, 0.167, 0.200)  | (0.224, 0.289, 0.408) | (0.577, 1, 1.732)     | (0.289, 0.408, 0.707) | (0.183, 0.224, 0.289) | (1, 1, 1)             | (0.111, 0.118, 0.126) |
| <b>C1</b>  | (2.449, 3.464, 4.472)  | (2.449, 3.464, 4.472)  | (5, 6, 7)             | (7.937, 8.485, 9)     | (6, 7, 8)             | (4, 5, 6)             | (7.937, 8.485, 9)     | (1, 1, 1)             |

**Table S5.** TOPSIS scores and augmented scores of technologies for case 3.

| <b>Technology</b>            | <b>TOPSIS score</b> | <b>Augmented score</b> |
|------------------------------|---------------------|------------------------|
| WSN                          | 0.257187            | 1                      |
| Active RFID                  | 0.287976            | 2                      |
| Semi passive RFID            | 0.309957            | 4                      |
| Smart packaging indicator    | 0.377133            | 8                      |
| RFID passive UHF read only   | 0.467505            | 16                     |
| RFID passive UHF Read write  | 0.477210            | 32                     |
| RFID passive UHF with sensor | 0.477210            | 64                     |
| RFID passive LF read only    | 0.534195            | 128                    |
| RFID passive LF read write   | 0.540315            | 256                    |
| RFID passive HF read-only    | 0.569547            | 512                    |
| RFID passive HF read-write   | 0.578913            | 1024                   |
| RFID passive HF with sensor  | 0.578913            | 2048                   |
| Paper form                   | 0.627669            | 4096                   |
| NFC                          | 0.837086            | 8192                   |
| 1D Barcode                   | 0.861254            | 16384                  |
| 2D barcode                   | 0.914570            | 32768                  |

**Table S6.** Combined pairwise criteria comparison matrix for two decision makers for case 4.

| Criteria | C1                       | C3                       | C4                       | C10                      | C8                       |
|----------|--------------------------|--------------------------|--------------------------|--------------------------|--------------------------|
| C1       | (1, 1, 1)                | (3, 4, 5)                | (5, 6, 7)                | (6, 6.7082, 7.3485)      | (4.8990, 5.9161, 6.9282) |
| C3       | (0.2000, 0.2500, 0.3333) | (1, 1, 1)                | (2, 3, 4)                | (2.2361, 3.4641, 4.5826) | (1.7321, 2.8284, 3.8730) |
| C4       | (0.1429, 0.1667, 0.2000) | (0.2500, 0.3333, 0.5000) | (1, 1, 1)                | (1, 1.4142, 2.2361)      | (0.5774, 1, 1.7321)      |
| C10      | (0.1361, 0.1491, 0.1667) | (0.2182, 0.2887, 0.4472) | (0.4472, 0.7071, 1)      | (1, 1, 1)                | (0.5774, 0.7746, 1)      |
| C8       | (0.1443, 0.1690, 0.2041) | (0.2582, 0.3536, 0.5774) | (0.5774, 1, 1.7321)      | (1, 1.2910, 1.7321)      | (1, 1, 1)                |
| C11      | (0.3333, 0.5000, 1)      | (2, 3, 4)                | (4, 5, 6)                | (4.5826, 5.6569, 6.7082) | (3.8730, 4.8990, 5.9161) |
| C17      | (0.2500, 0.3333, 0.5000) | (1, 2, 3)                | (3, 4, 5)                | (3.4641, 4.5826, 5.6569) | (2.8284, 3.8730, 4.8990) |
| C16      | (0.1111, 0.1250, 0.1429) | (0.1667, 0.2000, 0.2500) | (0.2500, 0.3333, 0.5000) | (0.4472, 0.7071, 1)      | (0.2582, 0.3536, 0.5774) |
| C15      | (0.1179, 0.1260, 0.1361) | (0.1690, 0.2041, 0.2582) | (0.2582, 0.3536, 0.5774) | (0.5774, 0.7746, 1)      | (0.2500, 0.3333, 0.5000) |
|          | C11                      | C17                      | C16                      | C15                      |                          |
| C1       | (1, 2, 3)                | (2, 3, 4)                | (7, 8, 9)                | (7.3485, 7.9373, 8.4853) |                          |
| C3       | (0.2500, 0.3333, 0.5000) | (0.3333, 0.5000, 1)      | (4, 5, 6)                | (3.8730, 4.8990, 5.9161) |                          |
| C4       | (0.1667, 0.2000, 0.2500) | (0.2000, 0.2500, 0.3333) | (2, 3, 4)                | (1.7321, 2.8284, 3.8730) |                          |
| C10      | (0.1491, 0.1768, 0.2182) | (0.1768, 0.2182, 0.2887) | (1, 1.4142, 2.2361)      | (1, 1.2910, 1.732)       |                          |
| C8       | (0.1690, 0.2041, 0.2582) | (0.2041, 0.2582, 0.3536) | (1.7321, 2.8284, 3.8730) | (2, 3, 4)                |                          |
| C11      | (1, 1, 1)                | (1, 2, 3)                | (6, 7, 8)                | (5.9161, 6.9282, 7.9373) |                          |
| C17      | (0.3333, 0.5000, 1)      | (1, 1, 1)                | (5, 6, 7)                | (4.8990, 5.9161, 6.9282) |                          |
| C16      | (0.1250, 0.1429, 0.1667) | (0.1429, 0.1667, 0.2000) | (1, 1, 1)                | (0.5774, 1, 1.7321)      |                          |
| C15      | (0.1260, 0.1443, 0.1690) | (0.1443, 0.1690, 0.2041) | (0.5774, 1, 1.7321)      | (1, 1, 1)                |                          |

**Table S7.** TOPSIS scores and augmented scores of technologies for case 4.

| <b>Technology</b>            | <b>TOPSIS score</b> | <b>Augmented Score</b> |
|------------------------------|---------------------|------------------------|
| RFID passive UHF read only   | 0.240285            | 1                      |
| RFID passive UHF read-write  | 0.246736            | 2                      |
| RFID passive LF read-only    | 0.277111            | 4                      |
| RFID passive LF read-write   | 0.279160            | 8                      |
| RFID passive HF read-only    | 0.294973            | 16                     |
| RFID passive HF read-write   | 0.298317            | 32                     |
| RFID passive UHF with sensor | 0.376246            | 64                     |
| NFC                          | 0.407724            | 128                    |
| WSN                          | 0.417762            | 256                    |
| RFID passive HF with sensor  | 0.422389            | 512                    |
| Active RFID                  | 0.424623            | 1024                   |
| Semi passive RFID            | 0.436032            | 2048                   |
| 2D barcode                   | 0.453108            | 4096                   |
| Paper records                | 0.552589            | 8192                   |
| 1D Barcode                   | 0.581226            | 16384                  |
| Smart packaging indicator    | 0.600892            | 32768                  |
